# Supplementary material for: Genotype Imputation from Low-Coverage WGS Using Haplotype Reference Panels in Cultivated Strawberry
Source: Research Square preprint supplement (doi:10.21203/rs.3.rs-7241985/v1), 2025-09-03
Supplement: Supplementary file 1 [file 87cdaf1e303c35e69b94c9cb.docx]

**Supplementary Figures**


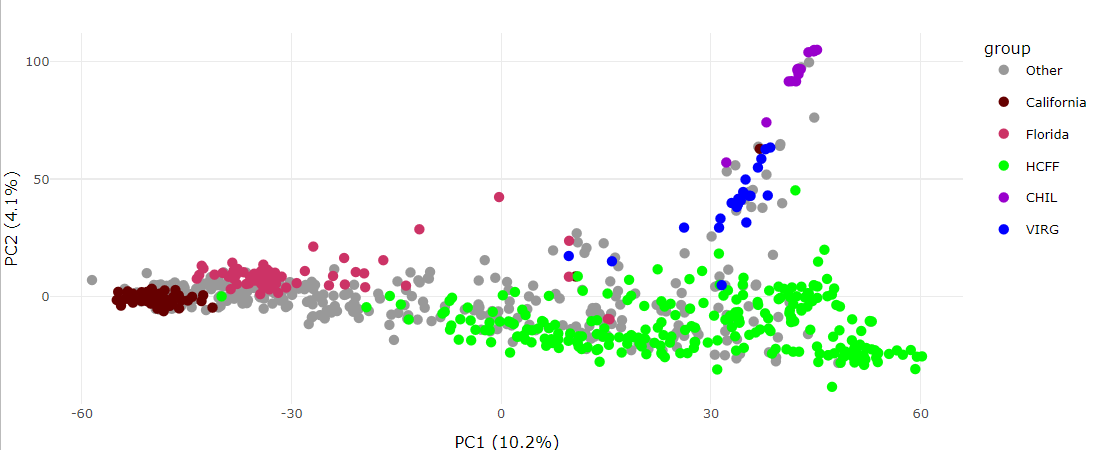


Figure S 1. Principal Component Analysis of all 740 samples, including F. virginiana (dark blue) and F. chiloensis (purple). High Chill Fresh Forward material is in green (including biparental population); Florida samples are in pink and California samples are in dark red.


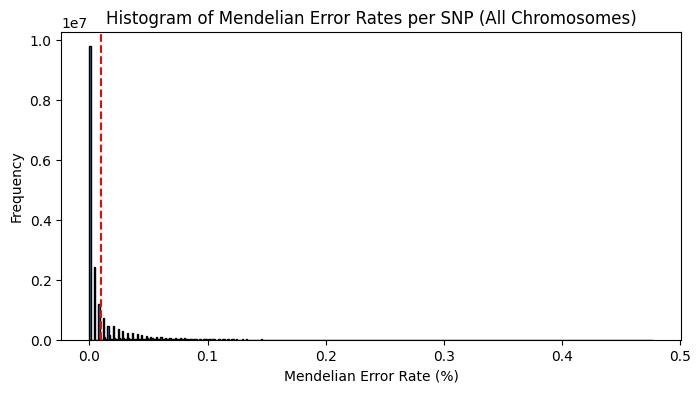


Figure S 2. Histogram of SNPs in Mendelian Error Rate bins, showing many SNPs with only few errors, and few SNPs with many errors. The red line indicates filtering threshold of 0.01.
