# Supplementary material for: Genotype Imputation from Low-Coverage WGS Using Haplotype Reference Panels in Cultivated Strawberry
Source: Research Square preprint supplement (doi:10.21203/rs.3.rs-7241985/v1), 2025-09-03
Supplement: Supplementary file 2 [file ff9fe06540a05a2f0681d5ff.xlsx]

## Sheet: my_results_012_supplementary
Sample_ID	Ground_Truth_Av_DP	Homozygous_Ref_Count	Heterozygous_Count	Homozygous_Alt_Count	Homozygous_Ref_Ratio	Heterozygous_Ratio	Homozygous_Alt_Ratio	Hom_Ref_Concordance	Het_Concordance	Hom_Alt_Concordance	Total_Concordance
05C107P002	21.2316	5249070	1390440	573364	0.727736	0.192772	0.0794918	0.998167	0.889298	0.99141	0.976643
08C017P005	24.3076	5347292	1361833	507959	0.740921	0.188696	0.0703829	0.998443	0.893883	0.990734	0.97817
08C181P001	20.3276	5443722	1233723	532433	0.755037	0.171116	0.0738477	0.998039	0.873081	0.991398	0.976166
10C017P002	16.6337	5391297	1314107	510349	0.747157	0.182116	0.0707271	0.996831	0.875983	0.986256	0.974075
10C124P002	15.3539	5366448	1443836	409374	0.743311	0.199987	0.0567027	0.996109	0.873024	0.984569	0.970839
11C055P004	18.3574	5293572	1417630	503678	0.733702	0.196487	0.069811	0.997088	0.87473	0.987915	0.972406
11C113P006	21.4297	5387663	1360573	468343	0.746567	0.188534	0.0648982	0.997648	0.879151	0.990001	0.974811
11C195P003	27.7279	5241822	1442012	534446	0.726187	0.199772	0.0740406	0.997646	0.874088	0.988074	0.972254
FL_10_92	39.803	4966923	1515067	717273	0.689921	0.210448	0.0996314	0.997959	0.903771	0.987696	0.977115
FL_12_101_18	31.7397	4897690	1563178	722891	0.681773	0.217599	0.100629	0.995239	0.900777	0.979264	0.973077
FL_12_102_51	27.7843	5025055	1518452	668748	0.696738	0.210538	0.0927238	0.9915	0.886187	0.975315	0.967827
FL_12_105_54	33.0638	4929491	1520426	764691	0.683265	0.210743	0.105992	0.993015	0.901432	0.972941	0.971587
FL_12_110_15	33.4704	4770643	1815084	610475	0.662939	0.252228	0.0848329	0.98725	0.884075	0.961253	0.959021
FL_13_27_142	31.1958	5114222	1306195	742587	0.713977	0.182353	0.10367	0.997036	0.894618	0.985972	0.977212
FL_13_46_88	32.8257	4929509	1538995	746540	0.683226	0.213304	0.10347	0.998287	0.899155	0.990389	0.976325
FL_14_101_225	25.7086	4724711	1754451	732220	0.655174	0.243289	0.101537	0.996671	0.900106	0.985108	0.972003
FL_14_61_80	34.329	5129652	1339557	711337	0.714382	0.186554	0.0990645	0.997535	0.896408	0.988114	0.977736
FL_15_79_23	38.9712	5100841	1271026	842890	0.707001	0.17617	0.116829	0.998755	0.905808	0.990517	0.981418
FL_15_81_58	35.8627	4985682	1434463	755737	0.694783	0.199901	0.105316	0.992558	0.896797	0.965549	0.970571
FL_17_20_51	30.5636	5011283	1322001	838538	0.698746	0.184333	0.116921	0.997297	0.894393	0.986372	0.977051
FL_17_71_151	30.8207	4985903	1546507	667270	0.692517	0.214802	0.0926805	0.997308	0.901585	0.986165	0.975714
FL_18_31_92	31.7532	4929069	1443129	766209	0.6905	0.202164	0.107336	0.996765	0.90479	0.985971	0.977013
FL_18_57_108	33.7008	5025070	1401368	737413	0.701448	0.195617	0.102935	0.9972	0.904695	0.984836	0.977832
FL_20_4_31	28.5074	5029975	1319455	837987	0.699831	0.183578	0.116591	0.997368	0.90215	0.987513	0.978739
HCFF_01	28.1915	4049190	2236206	927787	0.56136	0.310017	0.128624	0.992196	0.915226	0.969461	0.96541
HCFF_02	22.2628	4201645	1993941	1013496	0.582827	0.276587	0.140586	0.992444	0.901008	0.978368	0.965175
HCFF_03	65.5415	4284909	1964295	967478	0.593751	0.272188	0.134061	0.998381	0.913423	0.992255	0.974435
HCFF_04	23.7739	4187752	2115746	913233	0.580284	0.293172	0.126544	0.995416	0.908146	0.986853	0.968747
HCFF_05	56.3177	4188312	2146756	886786	0.57995	0.297258	0.122792	0.994032	0.897142	0.968529	0.962099
HCFF_06	26.7167	4194021	2222748	798739	0.581251	0.308051	0.110698	0.991936	0.911476	0.975096	0.965286
HCFF_07	16.9923	4340582	2136002	739441	0.60152	0.296008	0.102472	0.99501	0.888584	0.985695	0.962552
HCFF_08	29.0425	4591878	1741494	886025	0.636047	0.241224	0.122728	0.997472	0.915292	0.98913	0.976625
HCFF_09	16.9836	4244730	2086943	882546	0.588384	0.289282	0.122334	0.992777	0.895352	0.979211	0.962934
HCFF_10	20.9477	4445470	2066838	708348	0.61566	0.28624	0.0981002	0.997969	0.893029	0.991421	0.967289
HCFF_11	27.6805	4442264	2109523	668822	0.61522	0.292153	0.0926268	0.997189	0.918127	0.989381	0.973368
HCFF_12	17.7008	4297648	1986055	929183	0.595829	0.275348	0.128823	0.993682	0.893835	0.980641	0.964509
HCFF_13	18.3418	4487139	1664248	1050751	0.623029	0.231077	0.145894	0.994578	0.887186	0.983134	0.968093
HCFF_14	29.2183	4033211	2245458	936221	0.559012	0.311226	0.129762	0.995082	0.926017	0.971416	0.970517
HCFF_15	30.5058	4660341	1865798	694931	0.645381	0.258382	0.0962366	0.997596	0.911353	0.987223	0.974314
HCFF_16	18.1814	4578999	1904005	732989	0.634563	0.263859	0.101578	0.995348	0.888681	0.982196	0.965867
HCFF_17	29.6312	4525659	1764591	927829	0.626989	0.244468	0.128542	0.995676	0.898458	0.981196	0.970048
HCFF_18	27.2957	4763068	1810462	645215	0.659819	0.2508	0.0893805	0.997716	0.909141	0.987541	0.974592
HCFF_19	29.9494	4446963	2044957	729308	0.615818	0.283187	0.100995	0.993338	0.893426	0.971371	0.962826
HCFF_20	28.0587	4532423	1883168	804882	0.627718	0.26081	0.111472	0.994766	0.892086	0.978448	0.966167
HCFF_21	17.3557	4212802	2199825	805245	0.583663	0.304775	0.111563	0.995202	0.89528	0.986716	0.963802
HCFF_22	27.5444	4489288	1896545	835992	0.621628	0.262613	0.115759	0.988469	0.850543	0.955794	0.948465
HCFF_23	27.615	4605509	1902134	713074	0.637819	0.263427	0.0987539	0.991741	0.877623	0.969741	0.959507
HCFF_24	30.3605	4380400	1976280	862653	0.60676	0.273748	0.119492	0.993482	0.887958	0.972316	0.962065
HCFF_25	29.1263	4494487	1922379	803946	0.622435	0.266228	0.111337	0.993519	0.886686	0.973921	0.962895
HCFF_26	19.2779	4747761	1936413	532278	0.657908	0.268333	0.073759	0.996943	0.893534	0.989026	0.968611
HCFF_27 - (Outlier 1)	30.8457	4340779	2113102	769216	0.600958	0.292548	0.106494	0.976555	0.746712	0.924194	0.903739
HCFF_28	29.8188	4511502	1975209	735947	0.624632	0.273474	0.101894	0.986016	0.839186	0.944955	0.941678
HCFF_29	29.9413	4583690	1738325	896968	0.63495	0.240799	0.124251	0.994156	0.893289	0.978232	0.967889
HCFF_30	26.7761	4567503	2021330	633452	0.632418	0.279874	0.087708	0.989035	0.855386	0.961789	0.949241
HCFF_31 - (Outlier 2)	25.7245	3858987	2638808	723728	0.534373	0.365409	0.100218	0.981274	0.738772	0.950781	0.889606
HCFF_32 - (Outlier 3)	24.8414	3667253	3049823	506628	0.507669	0.422197	0.0701341	0.968379	0.667955	0.922817	0.838346
HCFF_33	30.0214	4627396	1905511	689570	0.640694	0.263831	0.0954756	0.991316	0.87593	0.969176	0.95876
HCFF_34	28.6653	4559349	1904693	758560	0.631261	0.263713	0.105026	0.990377	0.880891	0.973495	0.959731
HCFF_35	29.2924	4531138	1870776	818800	0.627519	0.259085	0.113396	0.993587	0.892275	0.977666	0.965533
HCFF_36	27.8042	4576878	1903209	741982	0.633735	0.263527	0.102738	0.991414	0.878571	0.973896	0.959877
HCFF_37	35.4481	4590275	2009895	623156	0.635479	0.278251	0.08627	0.993836	0.896013	0.971649	0.964703
HCFF_38	28.5728	4792349	1665329	762501	0.663744	0.230649	0.105607	0.997392	0.909686	0.98901	0.976277
HCFF_39	28.4517	4718329	1720269	782196	0.653436	0.238238	0.108325	0.992586	0.884002	0.972111	0.964499
HCFF_40	30.1303	4711553	1797053	713625	0.652368	0.248822	0.0988095	0.990185	0.866698	0.960059	0.956482
HCFF_41	31.2347	4347478	2070062	803664	0.602043	0.286664	0.111292	0.992731	0.882356	0.971621	0.958741
HCFF_42	23.8412	4452964	1972001	792279	0.61699	0.273235	0.109776	0.997329	0.903464	0.987648	0.970619
